# Supplementary material
Source: PubMed Central journal article supplement (PMC8155480)
Supplement: oc1c00080_si_001.pdf [file oc1c00080_si_001.pdf]

Supplementary Information for:

Native-like SARS-CoV-2 spike glycoprotein expressed by ChAdOx1  
nCoV-19/AZD1222 vaccine

Yasunori Watanabe<sup>1,2\*</sup>, Luiza Mendonça<sup>3\*</sup>, Elizabeth R. Allen<sup>4\*</sup>, Andrew Howe<sup>5</sup>, Mercedes Lee<sup>4</sup>, Joel D. Allen<sup>1</sup>, Himanshi Chawla<sup>1</sup>, David Pulido<sup>4</sup>, Francesca Donnellan<sup>4</sup>, Hannah Davies<sup>7</sup>, Marta Ulaszewska<sup>4</sup>, Sandra Belij-Rammerstorfer<sup>4,6</sup>, Susan Morris<sup>4</sup>, Anna-Sophia Krebs<sup>3</sup>, Wanwisa Dejnirattisai<sup>7</sup>, Juthathip Mongkolsapaya<sup>7,9,10</sup>, Piyada Supasa<sup>7</sup>, Gavin R. Screaton<sup>7,8</sup>, Catherine M. Green<sup>7</sup>, Teresa Lambe<sup>4,6,#</sup>, Peijun Zhang<sup>3,5,#</sup>, Sarah C. Gilbert<sup>4,6,#</sup>, Max Crispin<sup>1,#</sup>

<sup>1</sup>School of Biological Sciences, University of Southampton, Southampton, SO17 1BJ, UK

<sup>2</sup>Oxford Glycobiology Institute, Department of Biochemistry, University of Oxford, South Parks Road, Oxford, OX1 3QU, UK

<sup>3</sup>Division of Structural Biology, University of Oxford, Wellcome Centre for Human Genetics, Oxford, OX3 7BN, UK

<sup>4</sup>The Jenner Institute, Nuffield Department of Medicine, University of Oxford, Oxford, UK

<sup>5</sup>Electron Bio-imaging Centre, Diamond Light Source, Harwell Science and Innovation Campus, Didcot, OX11 0DE, UK

<sup>6</sup>NIHR Oxford Biomedical Research Centre, Oxford, UK

<sup>7</sup>The Wellcome Centre for Human Genetics, University of Oxford, Roosevelt Drive, Oxford OX3 7BN, UK

<sup>8</sup>Division of Medical Sciences, John Radcliffe Hospital, University of Oxford, Oxford, UK

<sup>9</sup>Dengue Hemorrhagic Fever Research Unit, Office for Research and Development, Faculty of Medicine, Siriraj Hospital, Mahidol University, Bangkok, Thailand

<sup>10</sup>Chinese Academy of Medical Science(CAMS) Oxford Institute (COI), University of Oxford, Oxford, U.K.

#Corresponding authors. Email: [max.crispin@soton.ac.uk](mailto:max.crispin@soton.ac.uk) (M.C.), [peijun@strubi.ox.ac.uk](mailto:peijun@strubi.ox.ac.uk) (P.Z), [sarah.gilbert@ndm.ox.ac.uk](mailto:sarah.gilbert@ndm.ox.ac.uk) (S.C.G.), [teresa.lambe@ndm.ox.ac.uk](mailto:teresa.lambe@ndm.ox.ac.uk) (T.L.)

\*These authors contributed equally to this work

This document includes:

Supplementary Figures 1-4

Supplementary Table 1

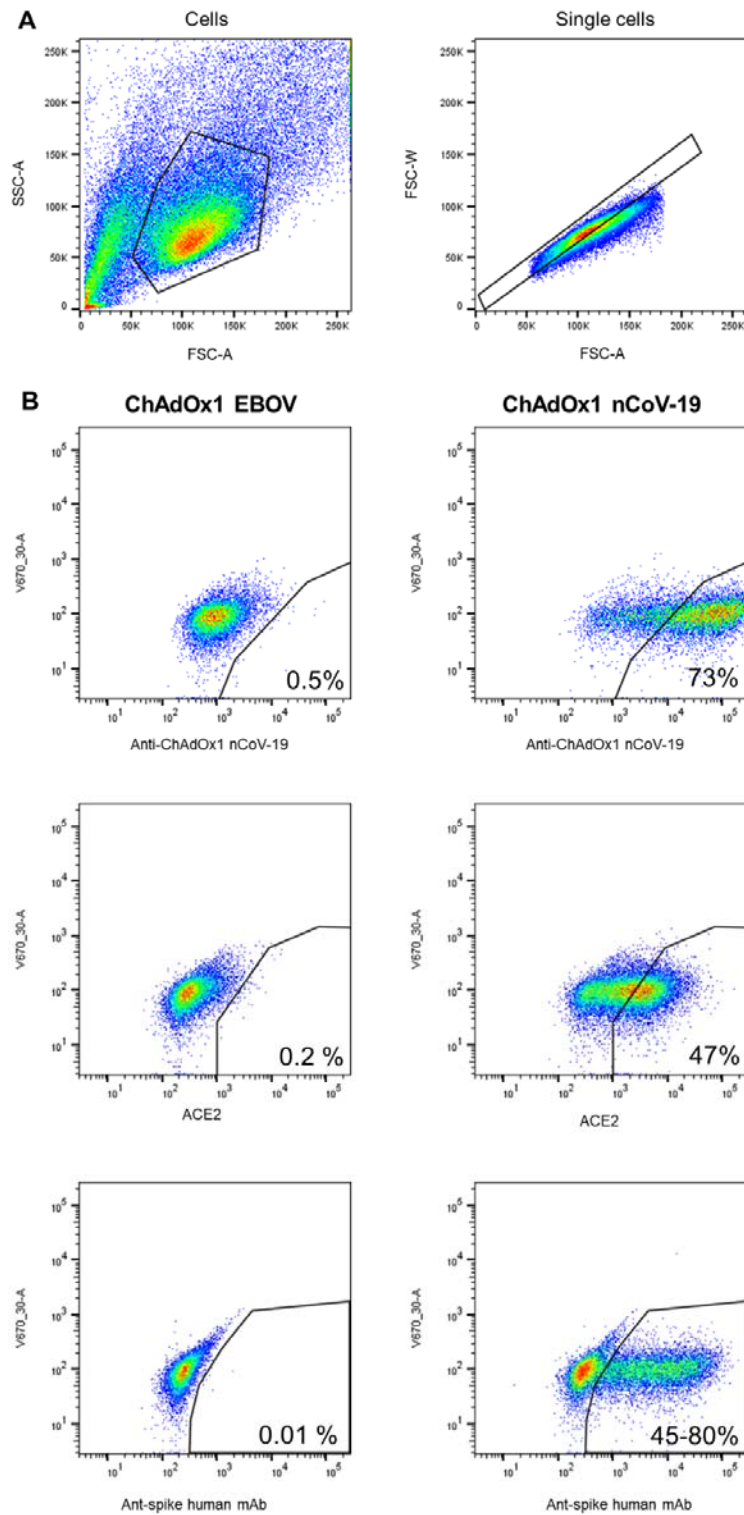

**Supplementary Figure 1. Gating strategy for vaccine expression FACS**

**(A)** Single cells were isolated for further analysis. **(B)** Percentages of positive cells were determined using the gating strategy determined in uninfected cells and displayed for ChAdOx1- EBOV (left panels) and ChAdOx1-nCoV19 (right panels) infected cells, with percentage of positive cells indicated in gate. Representative data is shown, for human mAbs data for mAb 71 is shown.

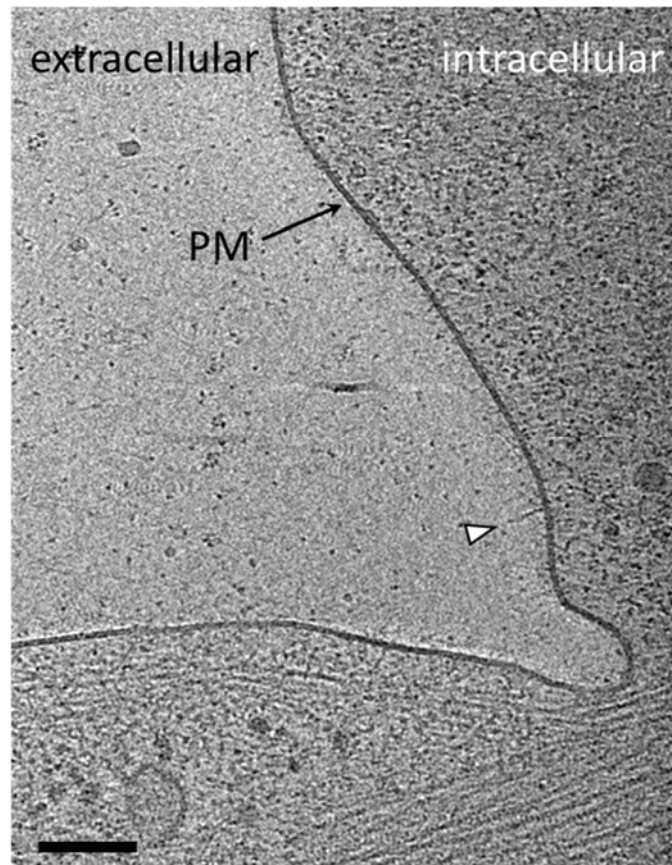

**Supplementary Figure 2. Non-transduced cells lack prefusion-like surface receptors.** Tomographic slice of U2OS control cell surface. PM – Plasma membrane. Slice is 2.13 Å thick. White arrowhead point to a thin and elongated surface receptor. Scale bar is 100 nm.

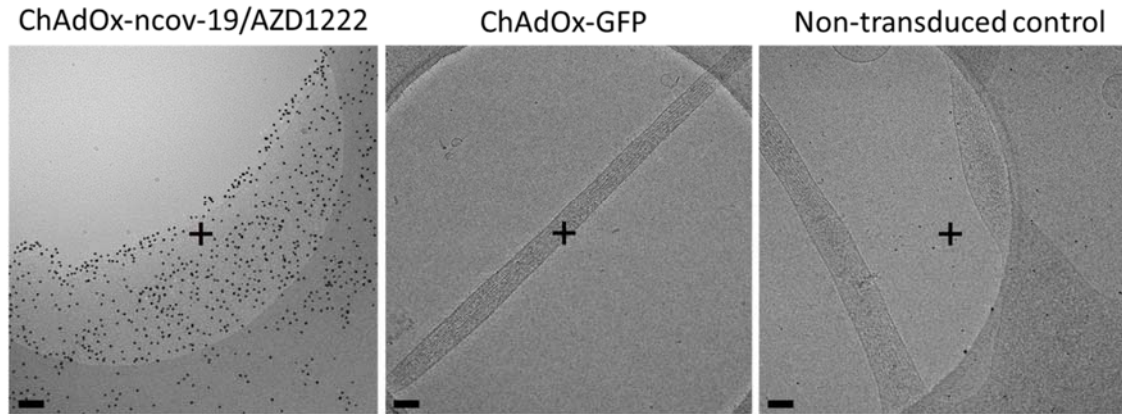

**Supplementary Figure 3. Cryoimmunolabelling of ChAdOx-nCoV-19/AZD1222 derived spike.** Cryo-EM image of U2OS cells transduced with ChAdOx-nCoV-19/AZD1222, ChAdOx-GFP and non-transduced controls. Cells were incubated with ChAdOx-nCoV-19/AZD1222 vaccinated mice sera and labelled with anti-mouse Fab conjugated with 10nm Au beads prior to plunge freezing. Scale bar is 100 nm.

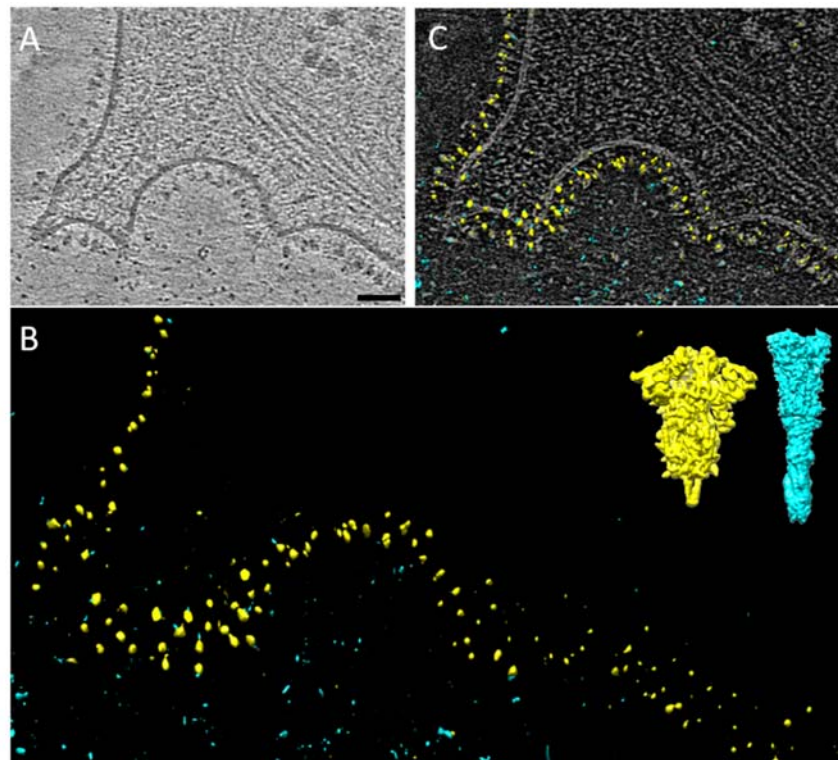

**Supplementary Figure 4. Template searching for pre- and post-fusion spike proteins.** (A) Tomographic slice of a ChAdOx nCoV-19 infected U2OS cell. (B) Results of template matching by cross-correlation of tomographic volume with either a pre-fusion spike reference (EMD-21452, yellow) or a post-fusion spike reference (EMD-7040, cyan). The resulting cross-correlation maps are projected through 18.5 nm thick volume. Inset, the pre- (yellow) and post-fusion (cyan) spike references. (C) The template matching results shown in (B) overlaid with a 1.6 nm thick tomographic slice in (A). Scale bar is 50 nm.

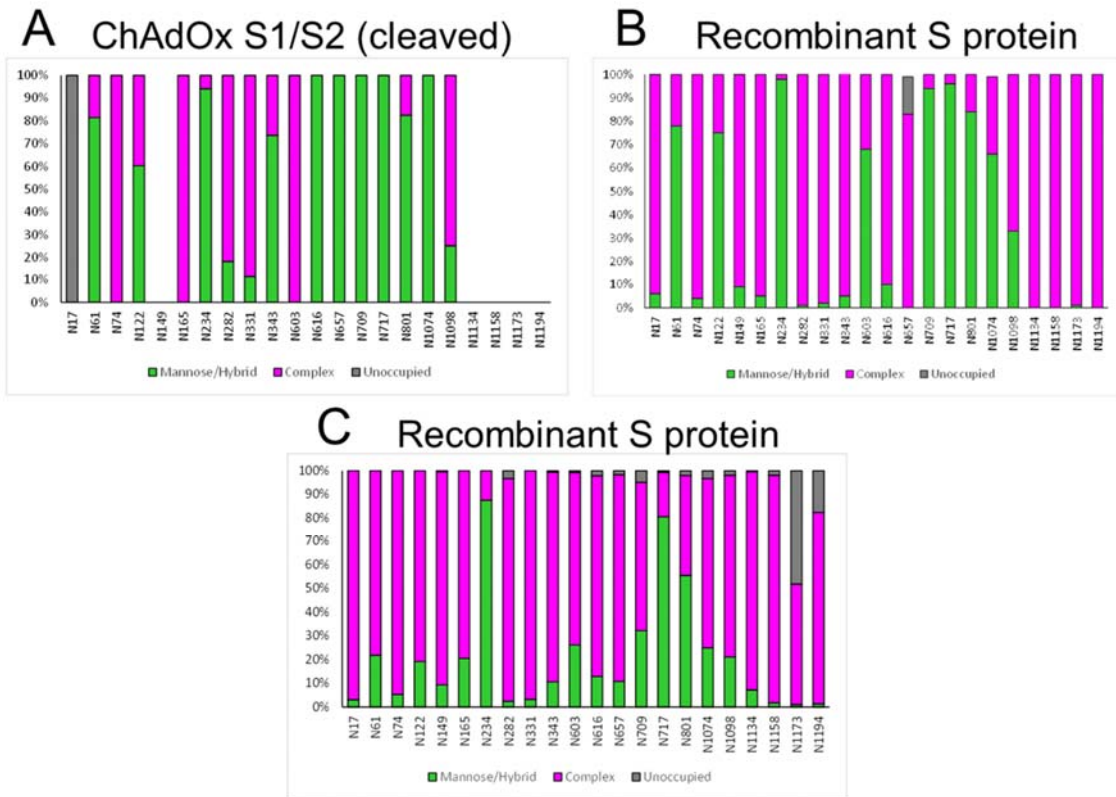

**Supplementary Figure 5.** A comparison of site-specific glycosylation analysis between ChAdOx-derived S1/S2 protein (**A**), and stabilized recombinant S proteins expressed in HEK 293F cells (**B & C**). Panels B and C represent data reproduced from earlier published studies (1, 2).

**Supplementary Table 1. Glycoform abundances observed across S0 and S1/S2 SARS-CoV-2 spike protein derived from ChAdOx1 nCoV-19.**

| Cleaved        |      |     |      |      |      |      |      |      |      |      |      |      |      |      |      |      |       |       |       |       |       |       |       |
|----------------|------|-----|------|------|------|------|------|------|------|------|------|------|------|------|------|------|-------|-------|-------|-------|-------|-------|-------|
|                | N17  | N61 | N74  | N122 | N149 | N165 | N234 | N282 | N331 | N343 | N603 | N616 | N657 | N709 | N717 | N801 | N1074 | N1098 | N1134 | N1158 | N1173 | N1194 | Total |
| Mannose/Hybrid | 0%   | 81% | 0%   | 60%  | n/a  | 0%   | 94%  | 18%  | 11%  | 74%  | 0%   | 100% | 100% | 100% | 100% | 82%  | 100%  | 25%   | n/a   | n/a   | n/a   | n/a   | 56%   |
| Complex        | 0%   | 19% | 100% | 40%  | n/a  | 100% | 6%   | 82%  | 89%  | 26%  | 100% | 0%   | 0%   | 0%   | 0%   | 18%  | 0%    | 75%   | n/a   | n/a   | n/a   | n/a   | 38%   |
| Unoccupied     | 100% | 0%  | 0%   | 0%   | n/a  | 0%   | 0%   | 0%   | 0%   | 0%   | 0%   | 0%   | 0%   | 0%   | 0%   | 0%   | 0%    | 0%    | n/a   | n/a   | n/a   | n/a   | 6%    |

  

| Uncleaved      |     |      |      |      |      |      |      |      |      |      |      |      |      |      |      |      |       |       |       |       |       |       |       |     |
|----------------|-----|------|------|------|------|------|------|------|------|------|------|------|------|------|------|------|-------|-------|-------|-------|-------|-------|-------|-----|
|                | N17 | N61  | N74  | N122 | N149 | N165 | N234 | N282 | N331 | N343 | N603 | N616 | N657 | N709 | N717 | N801 | N1074 | N1098 | N1134 | N1158 | N1173 | N1194 | Total |     |
| Mannose/Hybrid | n/a | 100% | 100% | 81%  | n/a  | 72%  | 98%  | 74%  | 78%  | 69%  | 69%  | 100% | 100% | 100% | 100% | 66%  | 86%   | 69%   | 100%  | n/a   | n/a   | n/a   | 73%   | 85% |
| Complex        | n/a | 0%   | 0%   | 19%  | n/a  | 28%  | 2%   | 26%  | 22%  | 31%  | 31%  | 0%   | 0%   | 0%   | 0%   | 34%  | 14%   | 31%   | 0%    | n/a   | n/a   | n/a   | 27%   | 15% |
| Unoccupied     | n/a | 0%   | 0%   | 0%   | n/a  | 0%   | 0%   | 0%   | 0%   | 0%   | 0%   | 0%   | 0%   | 0%   | 0%   | 0%   | 0%    | 0%    | 0%    | n/a   | n/a   | n/a   | 0%    | 0%  |

**Supplementary References**

1. Y. Watanabe, J. D. Allen, D. Wrapp, J. S. McLellan, M. Crispin, Site-specific glycan analysis of the SARS-CoV-2 spike. *Science* (2020), doi:10.1126/science.abb9983.
2. P. Zhao, J. L. Praissman, O. C. Grant, B. Chen, I. Brief, Y. Cai, T. Xiao, K. E. Rosenbalm, K. Aoki, B. P. Kellman, R. Bridger, D. H. Barouch, M. A. Brindley, N. E. Lewis, M. Tiemeyer, R. J. Woods, L. Wells, Virus-Receptor Interactions of Glycosylated SARS-CoV-2 Spike and Human ACE2 Receptor. *Cell Host Microbe*. **28**, 1–16 (2020).
